# Supplementary material for: KLF5 Is Crucial for Androgen-AR Signaling to Transactivate Genes and Promote Cell Proliferation in Prostate Cancer Cells
Source: PubMed Central journal article supplement (PMC7140031; doi:10.3390/cancers12030748), 2020-03-21
Supplement: cancers-12-00748-s001.pdf [file cancers-12-00748-s001.pdf]

**Supplementary Figure 1.** Unprocessed blot images for western blotting results.

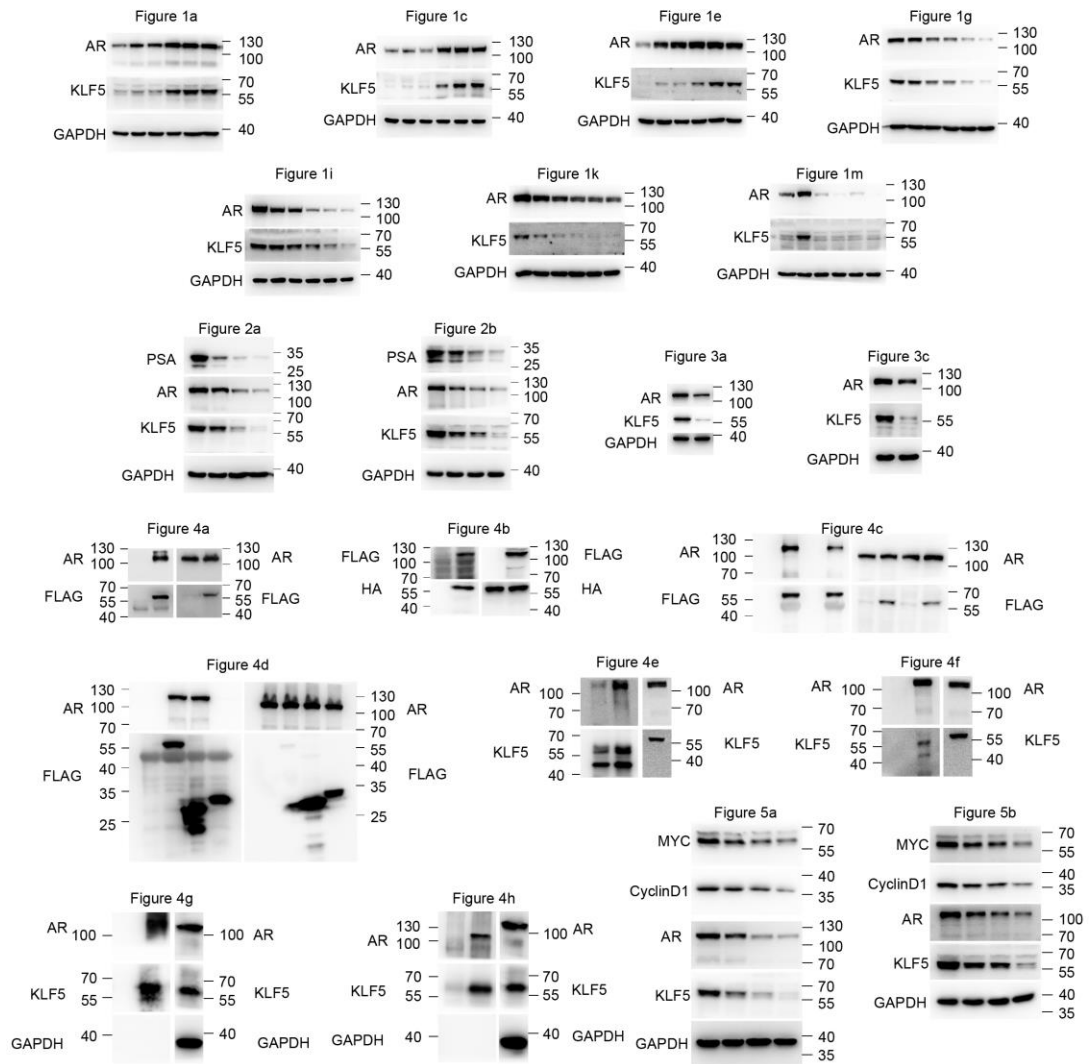

**Supplementary Table 1.** Primer sequences used in various PCRs in the study.

| Gene name                  | Forward (5' to 3')       | Reverse (5' to 3')       |
|----------------------------|--------------------------|--------------------------|
| <b>For real time qPCR:</b> |                          |                          |
| KLF5                       | ACTGCCCTCGGAGGAGCTGG     | ATGCTCTGAAATTATCGGAACTG  |
| AR                         | TCCATCTTGTCGTCTTCGGAA    | GGGCTGGTTGTTGTCGTGT      |
| PSA                        | GTGTGTGGACCTCCATGTTATT   | TGCCCCATGACGTGATACCT     |
| TMPRSS2                    | GCAGTGGTTTCTTTACGCTG     | CCGCAAATGCCGTCCAATG      |
| FKBP5                      | AATGGTGAGGAAACGCCGATG    | TCGAGGGAATTTTAGGGAGACT   |
| CyclinD1                   | CAATGACCCCGCACGATTTTC    | CATGGAGGGCGGATTGGAA      |
| MYC                        | GTCAAGAGGCGAACACACAAC    | TTGGACGGACAGGATGTATGC    |
| GAPDH                      | GGTGGTCTCCTCTGACTTCAACA  | GTTGCTGTAGCCAAATTCGTTGT  |
| <b>For ChIP-qPCR:</b>      |                          |                          |
| A region                   | GCTCTTATCAGTCCT          | GCTCCAGATTTTCCTG         |
| B region                   | CCTGGCGCCTAAACC          | TCCCACCTCCTTTTC          |
| C region                   | AGGCAAGGAGGCCGG          | AGCGGCTAGCTCGGC          |
| B1 region                  | TAGGCAGGCGTTAGCGC        | TCTCCCCTCCCCTCACCG       |
| B2 region                  | AAAAGGAAAGGGGAGGG        | TCCCACCTCCTTTTCCCT       |
| MYC                        | ACGCCGACCAGCTGGAGAT      | TCGTCGTCCGGGTCCGAGAT     |
| CyclinD1                   | CGTGCCCGTGTGCATGTCCT     | GTGGCCTTTCCCGACCCTGC     |
| PSA promoter               | TCTGCCTTTCTCCCCTAGAT     | AACCTTCATTCCCCAGGACT     |
| TMPRSS2<br>enhancer        | TGGAGCTAGTGCTGCATGTC     | CTGCCTTGCTGTGTGAAAAA     |
| FKBP5                      | GGTTCCTGGGCAGGAGTAAG     | AACGTGGATCCCACACTCTC     |
| <b>For gene cloning</b>    |                          |                          |
| AR                         | CTCGAGTCTATACACATTATGTCT | CGGCGGCTCGAAGCCGCTAAGCTT |
| AR1                        | CTCGAGTCTATACACATTATGTCT | AACCTTAGATCCGTCATAAAGCTT |
| AR2                        | CTCGAGCAGCAAGTATCTGCTGGC | CGGCGGCTCGAAGCCGCTAAGCTT |
